# Supplementary material for: Hollow fiber supported TiO2 monolithic microextraction combined with capillary HPLC-ICP-MS for sensitive absolute quantification of phosphopeptides
Source: Royal Society of Chemistry journal article supplement (doi:10.1039/c7ja00119c), 2017-01-01
Supplement: c7ja00119c1.pdf [file c7ja00119c1.pdf]

**Hollow fiber supported TiO<sub>2</sub> monolithic microextraction  
combined with capillary HPLC-ICP-MS for sensitive  
absolute quantification of phosphopeptides**

Shan Li, Beibei Chen\*, Man He\*, Bin Hu

Key Laboratory of Analytical Chemistry for Biology and Medicine (Ministry of Education),

Department of Chemistry, Wuhan University, Wuhan 430072, China

\* Corresponding author: [bbchen@whu.edu.cn](mailto:bbchen@whu.edu.cn); [heman@whu.edu.cn](mailto:heman@whu.edu.cn); Fax: +86-27-68754067; Tel:  
+86-27-68752162;

**Supplementary materials**

**Figure S1-S10**

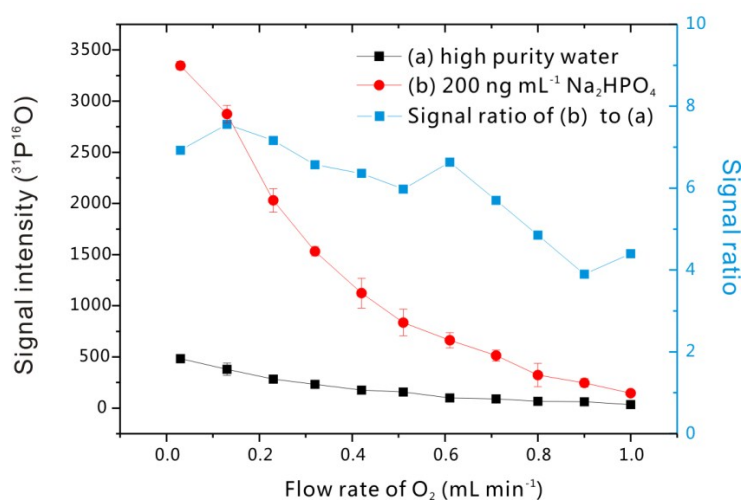

**Fig. S1** Effect of the flow rate of added O<sub>2</sub> on the signal intensity of <sup>31</sup>P<sup>16</sup>O.

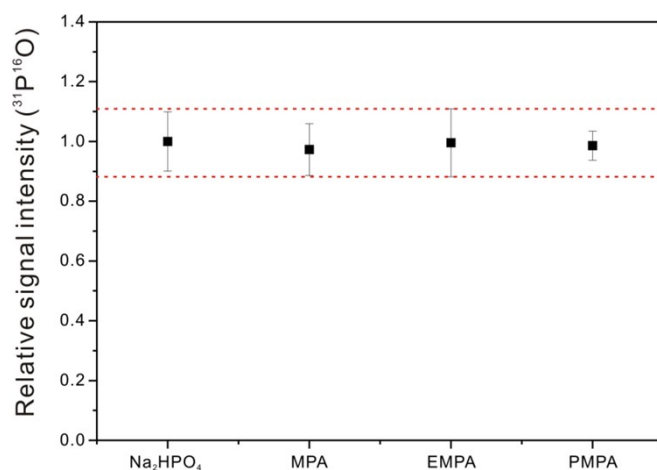

**Fig. S2** ICP-CRC-MS response of Na<sub>2</sub>HPO<sub>4</sub>, MPA, EMPA and PMPA (c: 100 ng as P mL<sup>-1</sup>).

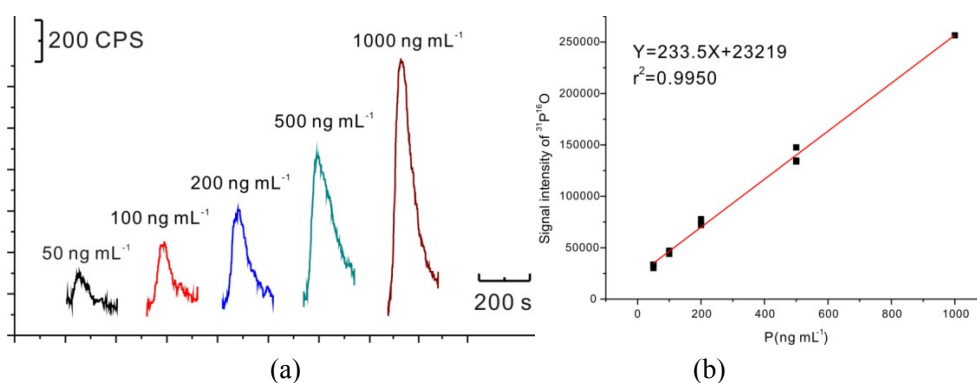

**Fig. S3** Signal profile of Na<sub>2</sub>HPO<sub>4</sub> at different concentrations obtained by capHPLC-ICP-CRC-MS (a) and the linear-fit curve (b).

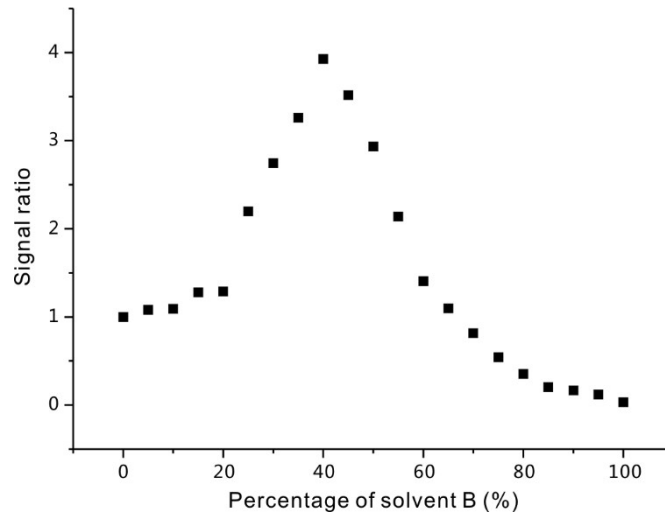

**Fig. S4** Signal ratio of  $\text{Na}_2\text{HPO}_4$  in mixed solvent A and B to that in solvent A obtained by capHPLC-ICP-CRC-MS. (solvent A: 0.1% (v/v) formic acid in water, solvent A: 0.1% (v/v) formic acid in acetonitrile)

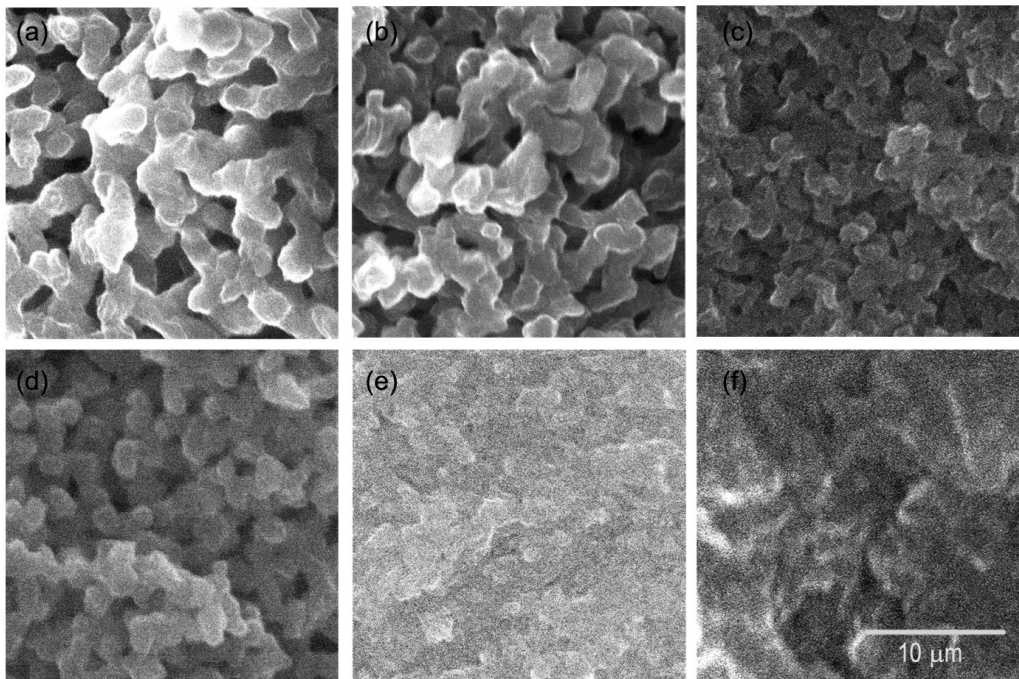

**Fig. S5** Scanning electron micrographs (a)-(f) of  $\text{TiO}_2$  monolith prepared by the method of No. 2, 3, 5, 6, 8 and 9, respectively.

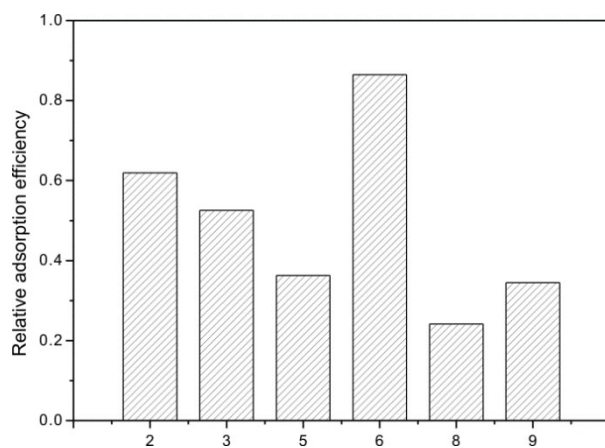

**Fig. S6** Adsorption efficiency of  $\beta$ -casein peptide standards on different  $\text{TiO}_2$  monoliths.

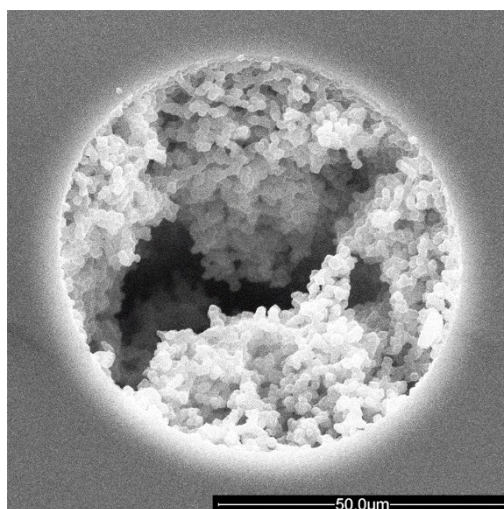

**Fig. S7** Scanning electron micrograph of  $\text{TiO}_2$  monolith prepared in fused silica capillary (50  $\mu\text{m}$  i.d.).

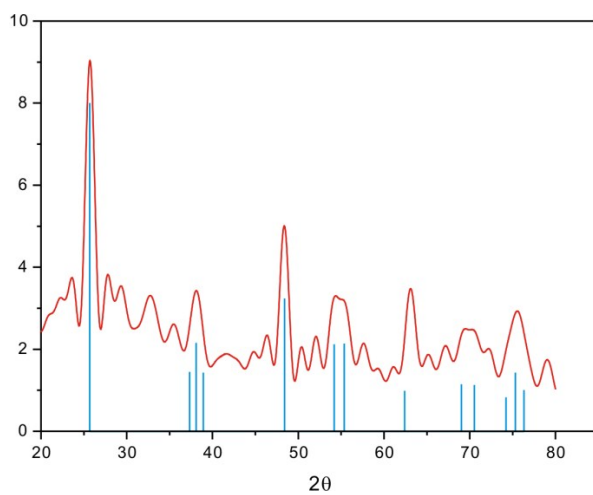

**Fig. S8** XRD of HF- $\text{TiO}_2$  monolith. Blue line was the theoretical XRD pattern for anatase  $\text{TiO}_2$ .

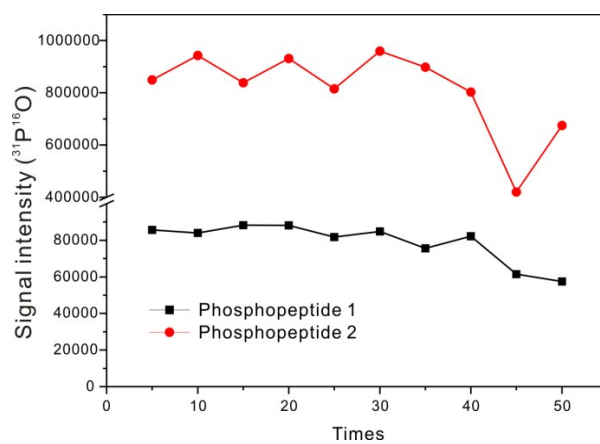

**Fig. S9** Lifespan of HF-TiO<sub>2</sub> monolith.

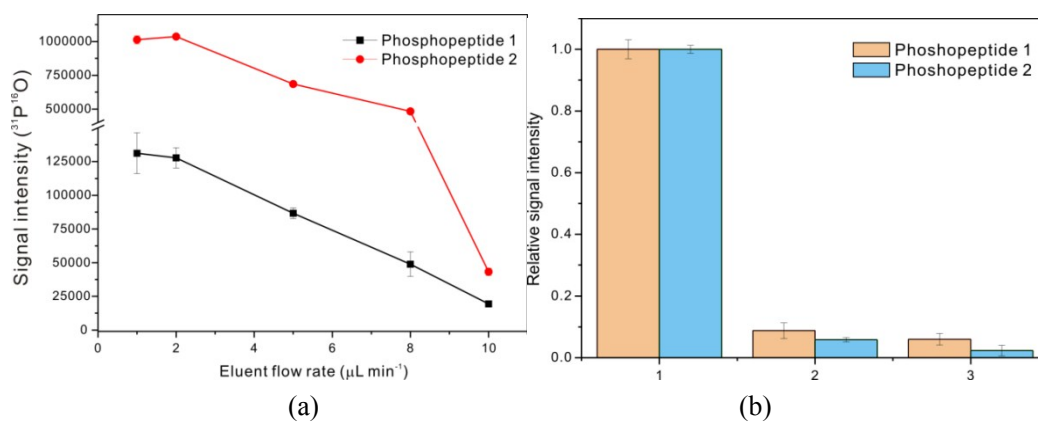

**Fig. S10** Effect of eluent flow rate (a) and eluent volume (b) on the signal intensity of phosphopeptides by HF-TiO<sub>2</sub> monolithic microextraction-capHPLC-ICP-CRC-MS.
